# Supplementary material for: Two Methods for the Isolation and Cultivation of Porcine Primary Corneal Cells
Source: MDPI journal article supplement (doi:10.3390/mps6030050), 2023-05-12
Supplement: s1 [file s1 › mps-2255144-supplementary.pdf]

# Supplementary material

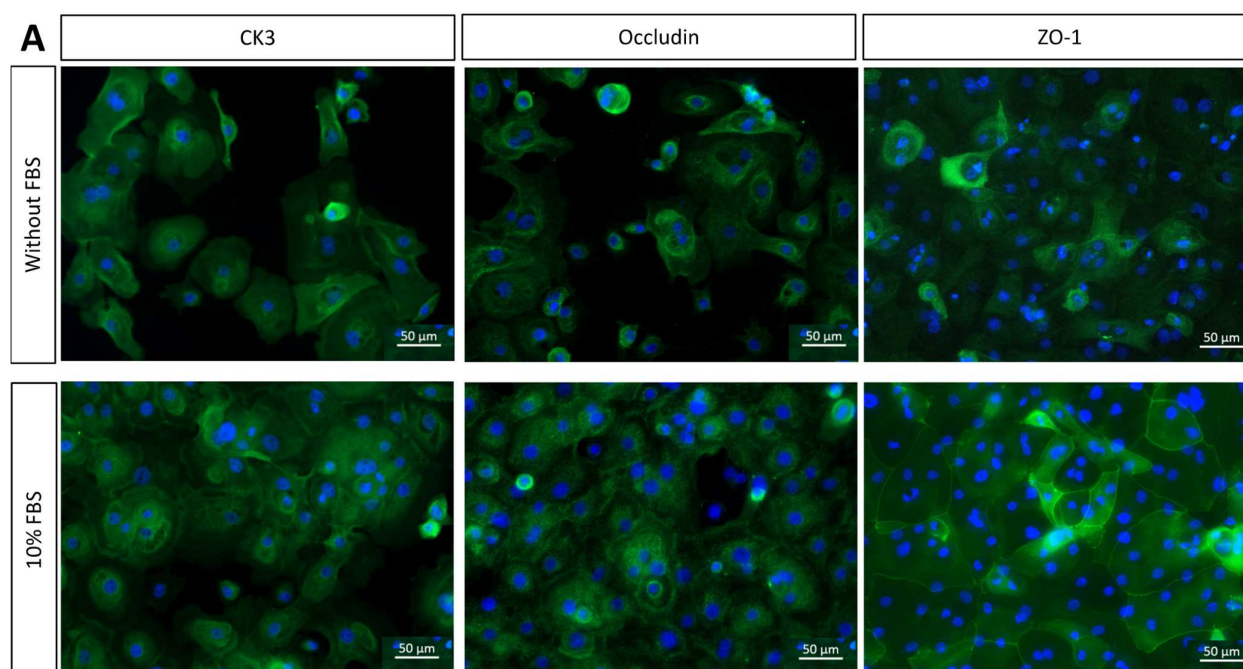

**B**

**CK12**

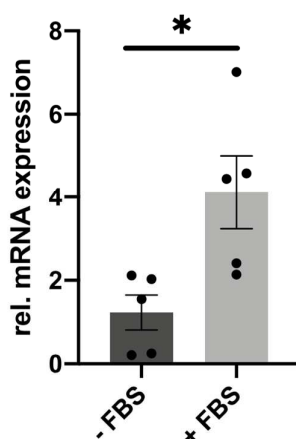

**Figure S1.** Antibodies targeting CK3, occludin and ZO-1 were used to analyze the presence of CK3 and ZO-1 in corneal cell cultures with and without FBS. In addition, the amount of CK12-mRNA expression was investigated. Cells were cultured for 4 weeks, split to chamber slides for immunostaining or frozen for qRT-PCR. CK3 and CK12 were used as epithelial cell markers, ZO-1 and occludin were used as tight junctions' markers. **(A)** CK3 signal was identified in both cell cultures, confirming the presence of corneal epithelial cells. Occludin and ZO-1 were also identified at both cell cultures. CK3 = green, ZO-1 = green, occludin = green, DAPI = blue. Scale bar = 50  $\mu$ m. **(B)** When the gene expression of *cytokeratin 12* was compared between the cell cultures, an upregulation of CK12 was observed at the cell culture cultivated with FBS ( $n = 5$  for cultures without FBS and for cultures with FBS). The bars represent the mean values, and the SEM is shown. The dots represent the  $n$  number in each group. \*  $p < 0.05$ .

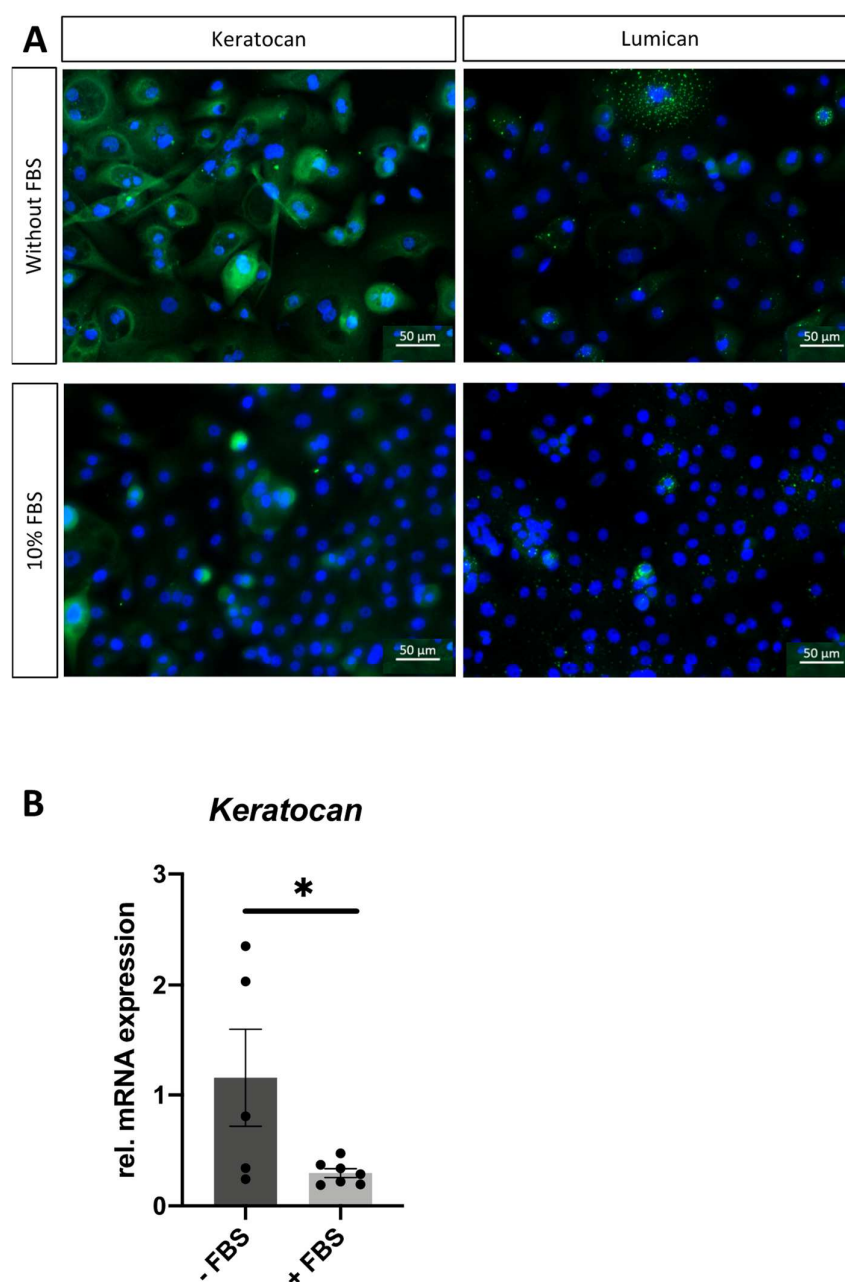

**Figure S2.** Antibodies targeting keratocan and lumican were used in the cell cultures to identify expression of these keratocyte's markers and quantification of *keratocan* mRNA expression was performed. (A) More keratocan positive and lumican positive cells were identified in the cell culture cultivated without FBS in comparison to the one cultivated with FBS, confirming a higher presence of keratocytes at the culture cultivated without FBS. Keratocan = green, Lumican = green, DAPI = blue. Scale bar = 50  $\mu$ m. (B) A downregulation of *keratocan* was noticed in the culture with FBS when compared with the culture without FBS ( $n = 5$  for cultures without FBS/  $n = 7$  for cultures with FBS). The bars represent the mean values, and the SEM is shown. The dots represent the  $n$  number in each group. \*  $p < 0.05$ .

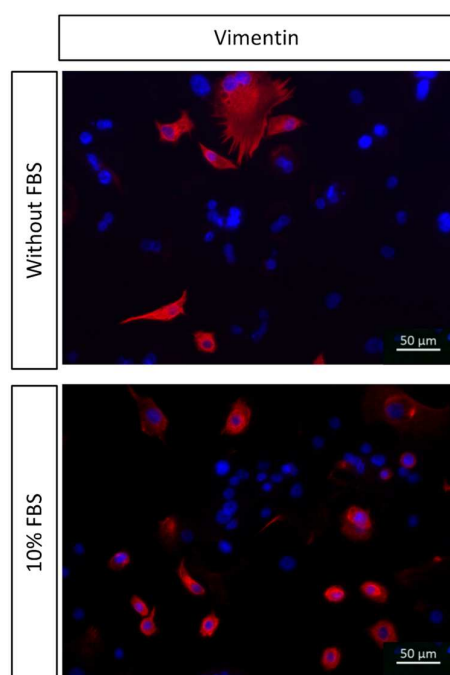

**Figure S3.** Vimentin positive cells. Vimentin positive cells, which are mainly mesenchymal cells and undifferentiated epithelial cells were found in both cell cultures cultivated with FBS and without it. Vimentin = red, DAPI = blue. Scale bar = 50 µm.

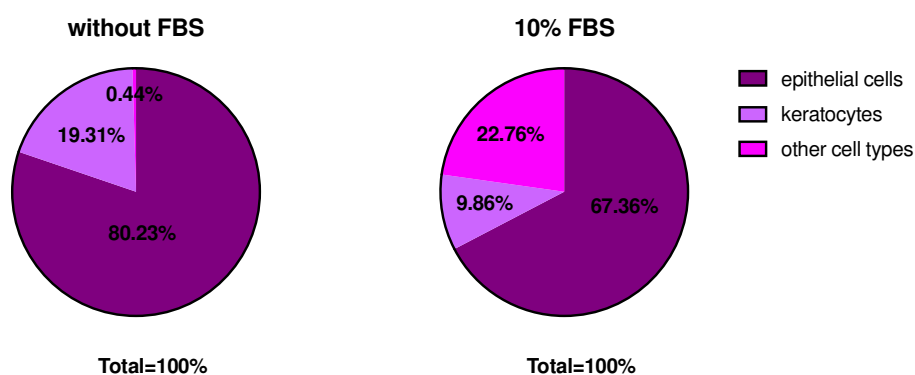

**Figure S4.** Proportion of different cell types. Cultures cultivated without FBS presented a majority of epithelial cells, some keratocytes and a small proportion of other cell types. In cultures cultivated without FBS the majority was again of epithelial cells, but other cell types had a bigger proportion than keratocytes.
